# Supplementary material for: virMine: automated detection of viral sequences from complex metagenomic samples
Source: PeerJ. 2019 Apr 10;7:e6695. doi: 10.7717/peerj.6695 (PMC6462185; doi:10.7717/peerj.6695)
Supplement: File S1 — Table listing the number of reads and a link to the publicly available raw data for each sample examined in the four case studies. [file peerj-07-6695-s001.xlsx]

## Sheet: Data Sets
Environment	DataSet	Sample	# Reads	Download Site
FRESHWATER	LMich	SRR1302020	3709054	https://www.ncbi.nlm.nih.gov/sra/SRR1302020
	LMich	SRR1302010	2247604	https://www.ncbi.nlm.nih.gov/sra/SRR1302010
	LMich	SRR1301999	3094314	https://www.ncbi.nlm.nih.gov/sra/SRR1301999
	LMich	SRR1296481	4404942	https://www.ncbi.nlm.nih.gov/sra/SRR1296481
	LN	SRR2147000	4597582	https://www.ncbi.nlm.nih.gov/sra/SRR2147000
URINARY	urine	mgm4568646	257790	https://www.imicrobe.us/project/view/190
	urine	mgm4568645	785652	https://www.imicrobe.us/project/view/190
	urine	mgm4568644	564278	https://www.imicrobe.us/project/view/190
	urine	mgm4568643	766694	https://www.imicrobe.us/project/view/190
	urine	mgm4568642	514004	https://www.imicrobe.us/project/view/190
	urine	mgm4568641	632903	https://www.imicrobe.us/project/view/190
	urine	mgm4568640	662120	https://www.imicrobe.us/project/view/190
	urine	mgm4568639	724661	https://www.imicrobe.us/project/view/190
	urine	mgm4568638	691906	https://www.imicrobe.us/project/view/190
	urine	mgm4568637	624144	https://www.imicrobe.us/project/view/190
GUT	crass	SRR073432_3	286146	https://www.ncbi.nlm.nih.gov/sra/SRR073432
	crass	SRR073433_3	13275	https://www.ncbi.nlm.nih.gov/sra/SRR073433
	crass	SRR073436_3	359698	https://www.ncbi.nlm.nih.gov/sra/SRR073433
	BGIgut	MH0001_081123	21735580	ftp://public.genomics.org.cn/BGI/gutmeta/High_quality_reads/
	BGIgut	MH0002_081203	8379820	ftp://public.genomics.org.cn/BGI/gutmeta/High_quality_reads/
	BGIgut	MH0002_081224	22334250	ftp://public.genomics.org.cn/BGI/gutmeta/High_quality_reads/
	BGIgut	MH0002_090117	15856025	ftp://public.genomics.org.cn/BGI/gutmeta/High_quality_reads/
	BGIgut	MH0003_081203	8955764	ftp://public.genomics.org.cn/BGI/gutmeta/High_quality_reads/
	BGIgut	MH0003_081224	21713344	ftp://public.genomics.org.cn/BGI/gutmeta/High_quality_reads/
	BGIgut	MH0003_090107	19715761	ftp://public.genomics.org.cn/BGI/gutmeta/High_quality_reads/
	BGIgut	MH0004_081026	21621606	ftp://public.genomics.org.cn/BGI/gutmeta/High_quality_reads/
	BGIgut	MH0004_081123	18666886	ftp://public.genomics.org.cn/BGI/gutmeta/High_quality_reads/
	BGIgut	MH0005_081109	19974655	ftp://public.genomics.org.cn/BGI/gutmeta/High_quality_reads/
	BGIgut	MH0005_081120	19432678	ftp://public.genomics.org.cn/BGI/gutmeta/High_quality_reads/
	BGIgut	MH0006_081109	19263552	ftp://public.genomics.org.cn/BGI/gutmeta/High_quality_reads/
	BGIgut	MH0006_081120	18965709	ftp://public.genomics.org.cn/BGI/gutmeta/High_quality_reads/
	BGIgut	MH0006_lane2	29637020	ftp://public.genomics.org.cn/BGI/gutmeta/High_quality_reads/
	BGIgut	MH0006_lane6	31262686	ftp://public.genomics.org.cn/BGI/gutmeta/High_quality_reads/
	BGIgut	MH0006_lane7	31841362	ftp://public.genomics.org.cn/BGI/gutmeta/High_quality_reads/
	BGIgut	MH0006_lane8	30213888	ftp://public.genomics.org.cn/BGI/gutmeta/High_quality_reads/
	BGIgut	MH0007_081109	17987224	ftp://public.genomics.org.cn/BGI/gutmeta/High_quality_reads/
	BGIgut	MH0007_081123	18969060	ftp://public.genomics.org.cn/BGI/gutmeta/High_quality_reads/
	BGIgut	MH0008_081113	18759201	ftp://public.genomics.org.cn/BGI/gutmeta/High_quality_reads/
	BGIgut	MH0008_081123	19397295	ftp://public.genomics.org.cn/BGI/gutmeta/High_quality_reads/
	BGIgut	MH0009_081203	9754059	ftp://public.genomics.org.cn/BGI/gutmeta/High_quality_reads/
	BGIgut	MH0009_081224	22571635	ftp://public.genomics.org.cn/BGI/gutmeta/High_quality_reads/
	BGIgut	MH0009_090109	26126810	ftp://public.genomics.org.cn/BGI/gutmeta/High_quality_reads/
	BGIgut	MH0010_081113	18435942	ftp://public.genomics.org.cn/BGI/gutmeta/High_quality_reads/
	BGIgut	MH0010_081120	20733908	ftp://public.genomics.org.cn/BGI/gutmeta/High_quality_reads/
	BGIgut	MH0011_081203	9914640	ftp://public.genomics.org.cn/BGI/gutmeta/High_quality_reads/
	BGIgut	MH0011_081224	22183065	ftp://public.genomics.org.cn/BGI/gutmeta/High_quality_reads/
	BGIgut	MH0011_090120	26405653	ftp://public.genomics.org.cn/BGI/gutmeta/High_quality_reads/
	BGIgut	MH0012_081203	10149140	ftp://public.genomics.org.cn/BGI/gutmeta/High_quality_reads/
	BGIgut	MH0012_081224	21377169	ftp://public.genomics.org.cn/BGI/gutmeta/High_quality_reads/
	BGIgut	MH0012_090120	26301489	ftp://public.genomics.org.cn/BGI/gutmeta/High_quality_reads/
	BGIgut	MH0012_lane2	31650780	ftp://public.genomics.org.cn/BGI/gutmeta/High_quality_reads/
	BGIgut	MH0012_lane4	31545099	ftp://public.genomics.org.cn/BGI/gutmeta/High_quality_reads/
	BGIgut	MH0012_lane5	31914736	ftp://public.genomics.org.cn/BGI/gutmeta/High_quality_reads/
	BGIgut	MH0013_081113	19963361	ftp://public.genomics.org.cn/BGI/gutmeta/High_quality_reads/
	BGIgut	MH0013_081120	20064759	ftp://public.genomics.org.cn/BGI/gutmeta/High_quality_reads/
	BGIgut	MH0014_081203	9558501	ftp://public.genomics.org.cn/BGI/gutmeta/High_quality_reads/
	BGIgut	MH0014_081224	20063561	ftp://public.genomics.org.cn/BGI/gutmeta/High_quality_reads/
	BGIgut	MH0014_090120	26682704	ftp://public.genomics.org.cn/BGI/gutmeta/High_quality_reads/
	BGIgut	MH0015_081108	15840290	ftp://public.genomics.org.cn/BGI/gutmeta/High_quality_reads/
	BGIgut	MH0015_081119	17174385	ftp://public.genomics.org.cn/BGI/gutmeta/High_quality_reads/
	BGIgut	MH0016_081203	9680910	ftp://public.genomics.org.cn/BGI/gutmeta/High_quality_reads/
	BGIgut	MH0016_081224	18070517	ftp://public.genomics.org.cn/BGI/gutmeta/High_quality_reads/
	BGIgut	MH0016_090120	26644594	ftp://public.genomics.org.cn/BGI/gutmeta/High_quality_reads/
	BGIgut	MH0017_081108	17140906	ftp://public.genomics.org.cn/BGI/gutmeta/High_quality_reads/
	BGIgut	MH0017_081119	19013456	ftp://public.genomics.org.cn/BGI/gutmeta/High_quality_reads/
	BGIgut	MH0018_081108	15979233	ftp://public.genomics.org.cn/BGI/gutmeta/High_quality_reads/
	BGIgut	MH0018_081119	20630462	ftp://public.genomics.org.cn/BGI/gutmeta/High_quality_reads/
	BGIgut	MH0019_081108	16854263	ftp://public.genomics.org.cn/BGI/gutmeta/High_quality_reads/
	BGIgut	MH0019_081119	22002517	ftp://public.genomics.org.cn/BGI/gutmeta/High_quality_reads/
	BGIgut	MH0020_081224	20205609	ftp://public.genomics.org.cn/BGI/gutmeta/High_quality_reads/
	BGIgut	MH0020_090120	25608037	ftp://public.genomics.org.cn/BGI/gutmeta/High_quality_reads/
	BGIgut	MH0001_081026	23281032	ftp://public.genomics.org.cn/BGI/gutmeta/High_quality_reads/
	BGIgut	MH0012_lane3	33123975	ftp://public.genomics.org.cn/BGI/gutmeta/High_quality_reads/
