# Supplementary material for: virMine: automated detection of viral sequences from complex metagenomic samples
Source: PeerJ. 2019 Apr 10;7:e6695. doi: 10.7717/peerj.6695 (PMC6462185; doi:10.7717/peerj.6695)
Supplement: File S3 — BLAST hit results for contigs identified by virMine and Virsorter for the Lake Michigan sample. [file peerj-07-6695-s003.xlsx]

## Sheet: SRR1296481_VirMine_only_contigs
Contig	Contig Length	Hit: Description	Hit: Annotation	Accession	Query Cov	ID
contig_583	6045	Pedobacter cryoconitis strain PAMC 27485	23S ribosomal RNA	CP014504.1	78	84
contig_603	5648	Aeromonas hydrophila strain AL06-06 plasmid pAH06-06-3	plasmid partition protein ParB; peptide transporter	CP010950.1	11	70
contig_940	2347	Delftia tsuruhatensis strain CM13	transposase	CP017420.1	48	85
contig_997	1889	Paucibacter sp. KCTC 42545	23S ribosomal RNA; 5S; 16S	CP013692.1	100	87
contig_999	1881	Caulobacter sp. K31	DNA-cytosine methyltransferase	CP000927.1	82	70
contig_1026	1712	Sphingomonas sanxanigenes NX02	hypothetical protein	CP006644.1	50	70
contig_1031	1684	Brevundimonas sp. DS20	asparaginase; 4-hydroxyphenylpyruvate dioxygenase; hypothetical protein	CP012897.1	66	94
contig_1070	1410	Brevundimonas sp. DS20	ribonuclease R	CP012897.1	100	95
contig_1072	1403	Acinetobacter baumannii strain B8300	integrase	CP021347.1	79	99
contig_1078	1373	Brevundimonas sp. DS20	hypothetical protein; diguanylate phosphodiesterase	CP012897.1	100	99
contig_1080	1361	Limnohabitans sp. 63ED37-2	ATP-dependent RNA helicase DbpA	CP011774.1	91	94
contig_1090	1319	Sphingomonas hengshuiensis strain WHSC-8	hypothetical protein	CP010836.1	81	77
contig_1107	1229	Sphingomonas koreensis strain ABOJV	hypothetical protein; histidine kinase	CP018820.1	36	80
contig_1118	1158	Sphingomonas sp. KC8	peptidase; TonB-dependent receptor	CP016306.1	98	72
contig_1136	1050	Culicoides sonorensis	not available	LN484026.1	4	88
contig_1141	1012	Sphingomonas koreensis strain ABOJV	phage portal protein; hypothetical protein	CP018820.1	98	77
contig_1151	967	Sphingomonas hengshuiensis strain WHSC-8	hypothetical protein; peptidase A8; isoleucine-tRNA ligase	CP010836.1	100	72
contig_1156	938	Brevundimonas sp. DS20	hypothetical protein; hypothetical protein; 16S rRNA methyltransferase	CP012897.1	100	95
contig_1158	934	Devosia sp. I507	DNA-binding response regulator	CP026747.1	89	87
contig_1161	919	Brevundimonas sp. GW460-12-10-14-LB2	hypothetical protein	CP015511.1	29	84
contig_1168	900	Strongyloides ratti Cubilin	not available	XM_024643226.1	3	94
contig_1175	879	Sphingomonas sanxanigenes NX02	hypothetical protein	CP006644.1	28	71
contig_1181	860	No hit
contig_1183	858	Xanthomonas citri pv. Fuscans CFBP 6988	not available	CP026331.1	72	71
contig_1186	843	Streptomyces olivaceus strain KLBMP 5084	not available	CP016795.1	3	97
contig_1187	843	Variovorax paradoxus EPS	TonB-dependent siderophore receptor	CP002417.1	100	78
contig_1191	826	Brevundimonas sp. DS20	hypothetical protein; queuine tRNA-ribosyltransferase	CP012897.1	100	98
contig_1208	765	Mitsuaria sp. 7	pyruvate ferredoxin oxidoreductase	CP011514.1	99	86
contig_1241	693	No hit
contig_1269	624	No hit
contig_1284	594	Brevundimonas sp. DS20	chemotaxis protein	CP012897.1	96	99
contig_1285	593	No hit
contig_1286	592	No hit
contig_1296	573	Brevundimonas sp. DS20	multidrug DMT transporter permease; pyridine nucleotide-disulfide oxidoreductase	CP012897.1	100	99
contig_1303	557	Devosia sp. I507	tRNA guanosine(34) transglycosylase Tgt	CP026747.1	86	82
contig_1304	557	Roseateles depolymerans strain KCTC 42856	Methyl-accepting chemotaxis protein	CP013729.1	76	84
contig_1310	549	Paucibacter sp. KCTC 42545	formimidoylglutamate deiminase	CP013692.1	62	82
contig_1327	509	No hit
contig_1334	469	Azospirillum brasilense Sp245	oxygen-independent coproporphyrinogen III oxidase	CP022253.1	9	91
contig_1338	491	No hit
contig_1350	478	No hit
contig_1354	475	Roseateles depolymerans strain KCTC 42856	acetyl-CoA carboxylase subunit alpha	CP013729.1	92	89
contig_1357	472	No hit
contig_1367	457	Devosia sp. A16	not available	CP012945.1	99	84
contig_1377	450	Pseudomonas soli strain SJ10	hypothetical protein	CP009365.1	100	98
contig_1389	444	No hit
contig_1397	441	No hit
contig_1432	415	No hit
contig_1434	414	Xanthomonas fragariae strain PD5205	2-oxoglutarate dehydrogenase E1 component	LT853885.1	11	94
contig_1437	412	No hit
contig_1455	403	No hit
contig_1456	403	Bradyrhizobium ottawaense strain GAS524	hypothetical protein	LT629693.1	69	76
contig_1458	402	Pseudomonas putida strain JBC17	acetyl-CoA carboxylase biotin carboxylase subunit	CP029693.1	32	85
contig_1463	398	Ramlibacter tataouinensis TTB310	phosphomannomutase/phosphoglucomutase-like protein	CP000245.1	81	80
contig_1465	397	No hit
contig_1468	394	Uncultured bacterium P1N3	regulatory protein MerR	KT944273.1	60	84
contig_1485	385	Polyangium brachysporum strain DSM 7029	methionine aminopeptidase	CP011371.1	89	88
contig_1504	247	No hit

## Sheet: SRR1296481_VirSort_only_contigs
VirSorter Category	Contig	Contig Length	Hit: Description	Hit: Annotation	Accession	Query Cov	ID
1	contig_119	23221	Pandoraea pnomenusa strain RB-44	hypothetical protein; hypothetical protein; helicase; hypothetical protein; hypothetical protein; hypothetical protein; hypothetical protein; terminase	CP006938.2	51	74
1	contig_742	4168	Freshwater phage uvFW-CGR-AMDFOS-S50-C341	hypothetical protein	KU886275.1	9	69
2	contig_59	44652	Brevundimonas sp. LM2	potassium transporter TrkA	CP019508.1	0	81
2	contig_81	33764	Sphingomonas sp. FARSPH	TolC family protein; CusA/CzcA family heavy metal efflux RND transporter	CP029985.1	18	84
2	contig_309	11637	Dechloromonas sp. HYN0024	hypothetical protein	CP301842.1	6	75
3	contig_378	9567	Delftia tsuruhatensis strain CM13	hypothetical protein	CP017420.1	2	77
3	contig_548	6585	No hit
3	contig_667	4958	Limnohabitans sp. 63ED37-2	tRNA-Gly; tRNA-Cys	CP011774.1	4	98
3	contig_668	4947	Sphingomonas koreensis strain ABOJV	deoxyuridine 5'-triphosphate nucleotidohydrolase	CP018820.1	8	83
3	contig_818	3384	Sphingomonas panacis strain DCY99	5S ribosomal RNA; tRNA-Met	CP014168.1	6	83
3	contig_1164	916	No hit
5	contig_1	37439	Laribacter hongkongensis HLHK9	hypothetical protein	CP001154.1	1	80
5	contig_32	53504	Sphingomonas taxi strain ATCC 55669	threonine aldolase	CP00957.1	2	76
5	contig_261	9915	Brevundimonas sp. DS20	hypothetical protein; tRNA-Thr	CP012897.1	5	99
5	contig_336	6772	Brevundimonas sp. DS20	tRNA-Thr; hypothetical protein; methionine sulfoxide reductase B	CP012897.1	11	99
6	contig_2	116342	Sphingobacteriaceae bacterium GW460-11-11-14-LB5	ribonucleoside-diphosphate reductase subunit alpha	CP021237.1	1	73
6	contig_2	23332	Mucilaginibacter mallensis strain MP1X4	not available	LT629740.1	0	95
6	contig_3	73666	Polaribacter sp. SA4-12	methylmalonyl-CoA mutase	CP019334.1	2	75
